# Supplementary material for: System Performance Corresponding to Bacterial Community Succession after a Disturbance in an Autotrophic Nitrogen Removal Bioreactor
Source: PubMed Central journal article supplement (PMC7566277; doi:10.1128/msystems.00398-20), 2020-07-21

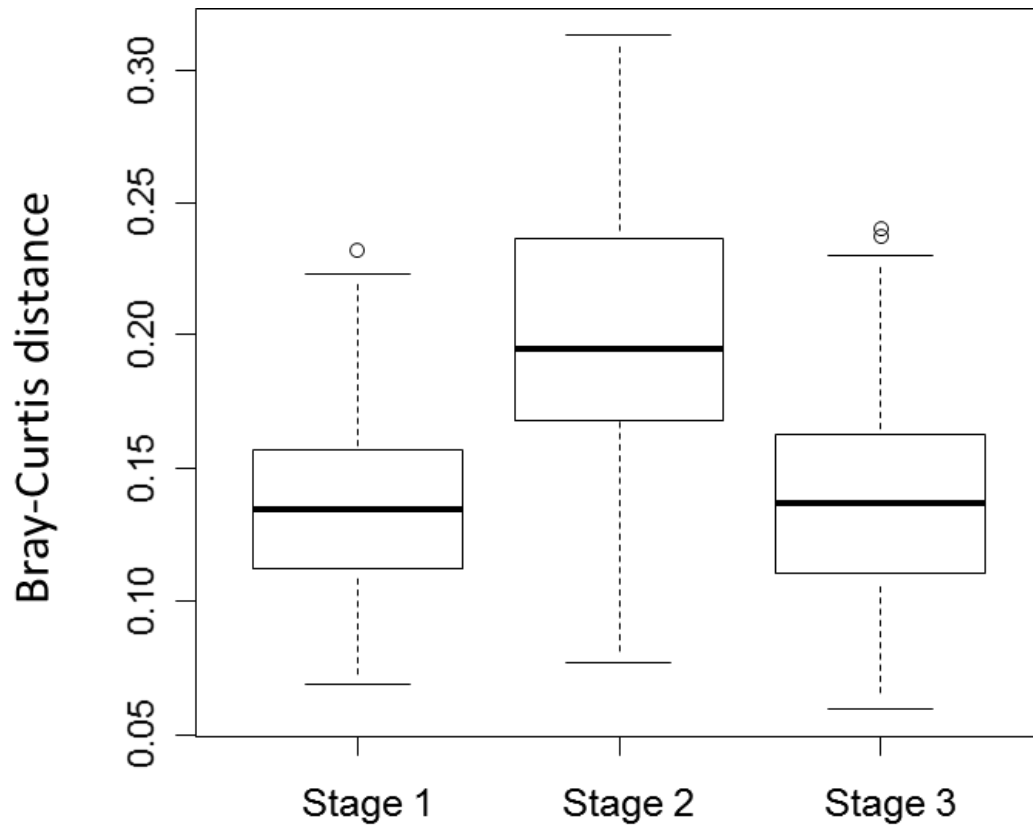

Supplement: mSystems.00398-20-sf003.pdf [file mSystems.00398-20-sf003.pdf]
