# Supplementary material for: System Performance Corresponding to Bacterial Community Succession after a Disturbance in an Autotrophic Nitrogen Removal Bioreactor
Source: PubMed Central journal article supplement (PMC7566277; doi:10.1128/msystems.00398-20), 2020-07-21
Supplement: mSystems.00398-20-st001.pdf [file mSystems.00398-20-st001.pdf]

| Sample ID | Sampling day | Time series | Successional stage |
|-----------|--------------|-------------|--------------------|
| CB0711A01 | 2017-07-11   | 1           | Early              |
| CB0712A02 | 2017-07-12   | 2           | Early              |
| CB0713A03 | 2017-07-13   | 3           | Early              |
| CB0714A04 | 2017-07-14   | 4           | Early              |
| CB0715A05 | 2017-07-15   | 5           | Early              |
| CB0716A06 | 2017-07-16   | 6           | Early              |
| CB0717A07 | 2017-07-17   | 7           | Early              |
| CB0718A08 | 2017-07-18   | 8           | Early              |
| CB0719A09 | 2017-07-19   | 9           | Early              |
| CB0720A10 | 2017-07-20   | 10          | Early              |
| CB0721A11 | 2017-07-21   | 11          | Early              |
| CB0722A12 | 2017-07-22   | 12          | Early              |
| CB0725A13 | 2017-07-25   | 13          | Early              |
| CB0728A14 | 2017-07-28   | 14          | Middle             |
| CB0731A15 | 2017-07-31   | 15          | Middle             |
| CB0803A16 | 2017-08-03   | 16          | Middle             |
| CB0806A17 | 2017-08-06   | 17          | Middle             |
| CB0808A18 | 2017-08-08   | 18          | Middle             |
| CB0811A19 | 2017-08-11   | 19          | Middle             |
| CB0812A20 | 2017-08-12   | 20          | Middle             |
| CB0813A21 | 2017-08-13   | 21          | Middle             |
| CB0814A22 | 2017-08-14   | 22          | Middle             |
| CB0815A23 | 2017-08-15   | 23          | Middle             |
| CB0817A24 | 2017-08-17   | 24          | Middle             |
| CB0818A25 | 2017-08-18   | 25          | Middle             |
| CB0819A26 | 2017-08-19   | 26          | Middle             |
| CB0820A27 | 2017-08-20   | 27          | Middle             |
| CB0823A28 | 2017-08-23   | 28          | Middle             |
| CB0824A29 | 2017-08-24   | 29          | Middle             |
| CB0825A30 | 2017-08-25   | 30          | Middle             |
| CB0826A31 | 2017-08-26   | 31          | Middle             |
| CB0827A32 | 2017-08-27   | 32          | Middle             |
| CB0828A33 | 2017-08-28   | 33          | Middle             |
| CB0829A34 | 2017-08-29   | 34          | Middle             |
| CB0830A35 | 2017-08-30   | 35          | Last               |
| CB0831A36 | 2017-08-31   | 36          | Last               |

|           |            |    |      |
|-----------|------------|----|------|
| CB0901A37 | 2017-09-01 | 37 | Last |
| CB0902A38 | 2017-09-02 | 38 | Last |
| CB0903A39 | 2017-09-03 | 39 | Last |
| CB0904A40 | 2017-09-04 | 40 | Last |
| CB0905A41 | 2017-09-05 | 41 | Last |
| CB0906A42 | 2017-09-06 | 42 | Last |
| CB0907A43 | 2017-09-07 | 43 | Last |
| CB0908A44 | 2017-09-08 | 44 | Last |
| CB0909A45 | 2017-09-09 | 45 | Last |
| CB0910A46 | 2017-09-10 | 46 | Last |
| CB0911A47 | 2017-09-11 | 47 | Last |
| CB0912A48 | 2017-09-12 | 48 | Last |
| CB0913A49 | 2017-09-13 | 49 | Last |
| CB0914A50 | 2017-09-14 | 50 | Last |
| CB0915A51 | 2017-09-15 | 51 | Last |
| CB0916A52 | 2017-09-16 | 52 | Last |
| CB0917A53 | 2017-09-17 | 53 | Last |
| CB0918A54 | 2017-09-18 | 54 | Last |
| CB0919A55 | 2017-09-19 | 55 | Last |
| CB0920A56 | 2017-09-20 | 56 | Last |

---
