# Supplementary material for: System Performance Corresponding to Bacterial Community Succession after a Disturbance in an Autotrophic Nitrogen Removal Bioreactor
Source: PubMed Central journal article supplement (PMC7566277; doi:10.1128/msystems.00398-20), 2020-07-21
Supplement: mSystems.00398-20-st002.pdf [file mSystems.00398-20-st002.pdf]

| ID  | Genus                      | Whole      | Early             | Middle                        | Last             |
|-----|----------------------------|------------|-------------------|-------------------------------|------------------|
| G1  | <i>Nitrospira</i>          | 28.75±7.94 | 17.56±2.29        | <b>34.84±5.79<sup>#</sup></b> | 29.55±3.85       |
| G2  | <i>Candidatus Jettenia</i> | 21.44±8.44 | <b>33.68±4.40</b> | 14.86±4.76                    | 20.49±4.09       |
| G3  | <i>Nitrosomonas</i>        | 9.16±2.16  | <b>11.79±1.66</b> | 8.99±1.90                     | 7.76±0.92        |
| G4  | Groundwater metagenome     | 3.90±0.74  | 4.03±0.85         | 3.46±0.49                     | <b>4.23±0.68</b> |
| G5  | AKYH767 (uncultured)       | 2.74±1.11  | 1.17±0.15         | 2.60±0.50                     | <b>3.81±0.46</b> |
| G6  | SM1A02 (uncultured)        | 1.66±0.35  | 1.73±0.28         | 1.72±0.47                     | 1.57±0.23        |
| G7  | <i>Denitratisoma</i>       | 1.50±0.57  | <b>2.34±0.54</b>  | 1.07±0.15                     | 1.40±0.21        |
| G8  | <i>Sideroxydans</i>        | 1.44±0.54  | <b>2.36±0.29</b>  | 1.16±0.12                     | 1.16±0.13        |
| G9  | OLB12 (uncultured)         | 1.03±0.44  | 0.44±0.08         | <b>1.34±0.31</b>              | 1.09±0.30        |
| G10 | <i>Bryobacter</i>          | 0.94±0.27  | 0.58±0.13         | <b>1.06±0.24</b>              | 1.03±0.16        |

<sup>#</sup>The value in bold indicates a significant association ( $p$ -value < 0.05) between a genus and a particular successional stage based on the indicator value analysis using the point-biserial correlation coefficient as the association index.
