# Supplementary material for: System Performance Corresponding to Bacterial Community Succession after a Disturbance in an Autotrophic Nitrogen Removal Bioreactor
Source: PubMed Central journal article supplement (PMC7566277; doi:10.1128/msystems.00398-20), 2020-07-21
Supplement: mSystems.00398-20-st003.pdf [file mSystems.00398-20-st003.pdf]

| <b>(a)</b><br>Successional stage | <b>Richness</b> |       | <b>Shannon</b> |       | <b>Evenness</b> |       |
|----------------------------------|-----------------|-------|----------------|-------|-----------------|-------|
|                                  | Mean            | CV(%) | Mean           | CV(%) | Mean            | CV(%) |
| Early                            | 306             | 19.06 | 4.79           | 5.12  | 0.58            | 4.93  |
| Middle                           | 357             | 17.21 | 5.46           | 6.03  | 0.65            | 4.27  |
| Final                            | 375             | 15.73 | 5.37           | 3.82  | 0.63            | 3.41  |
| Whole                            | 352             | 18.32 | 5.26           | 7.14  | 0.62            | 5.64  |

| <b>(b)</b><br>Successional stage | <b>Temperature</b> |       | <b>pH</b> |       | <b>O<sub>2</sub></b> |       |
|----------------------------------|--------------------|-------|-----------|-------|----------------------|-------|
|                                  | Mean               | CV(%) | Mean      | CV(%) | Mean                 | CV(%) |
| Early                            | 28.86              | 3.70  | 7.84      | 2.02  | 0.41                 | 58.48 |
| Middle                           | 29.35              | 2.34  | 7.61      | 2.42  | 0.25                 | 56.72 |
| Final                            | 29.93              | 0.17  | 7.52      | 1.12  | 0.13                 | 26.51 |
| Whole                            | 29.35              | 3.07  | 7.66      | 2.64  | 0.24                 | 85.94 |
