# Supplementary material for: System Performance Corresponding to Bacterial Community Succession after a Disturbance in an Autotrophic Nitrogen Removal Bioreactor
Source: PubMed Central journal article supplement (PMC7566277; doi:10.1128/msystems.00398-20), 2020-07-21
Supplement: mSystems.00398-20-st004.pdf [file mSystems.00398-20-st004.pdf]

| Successional stage | Mean  | CV  | MK tau <sup>#</sup> | (p-value)        | Sen's slope <sup>*</sup> | (95% CI for slope)       |
|--------------------|-------|-----|---------------------|------------------|--------------------------|--------------------------|
| Early              | 0.553 | 32% | <b>-0.471</b>       | <b>&lt;0.001</b> | <b>-0.026</b>            | <b>(-0.035 ~ -0.005)</b> |
| Middle             | 0.453 | 31% | <b>0.692</b>        | <b>&lt;0.001</b> | <b>0.019</b>             | <b>(0.014 ~ 0.025)</b>   |
| Last               | 0.627 | 20% | -0.179              | 0.284            | -0.003                   | (-0.009 ~ 0.004)         |

<sup>#</sup>A significant tau indicates an increasing (+) or decreasing (-) trend.

<sup>\*</sup>The Sen's slope indicates the magnitude of the trend.
