# Supplementary material for: System Performance Corresponding to Bacterial Community Succession after a Disturbance in an Autotrophic Nitrogen Removal Bioreactor
Source: PubMed Central journal article supplement (PMC7566277; doi:10.1128/msystems.00398-20), 2020-07-21
Supplement: mSystems.00398-20-st005.pdf [file mSystems.00398-20-st005.pdf]

| ID  | Genus                      | FAPROTAX <sup>#</sup> functional annotation                 |
|-----|----------------------------|-------------------------------------------------------------|
| G1  | <i>Nitrospira</i>          | Aerobic nitrite oxidation and/or Aerobic ammonia oxidation  |
| G2  | <i>Candidatus Jettenia</i> | Anammox ( <i>i.e.</i> anaerobic ammonia oxidation)          |
| G3  | <i>Nitrosomonas</i>        | Aerobic ammonia oxidation and/or Ureolysis                  |
| G4  | Groundwater metagenome     | Unassigned (belonging to Planctomycetes anammox bacterium*) |
| G5  | AKYH767 (uncultured)       | Unassigned (belonging to Bacteroidetes bacterium*)          |
| G6  | SM1A02 (uncultured)        | Unassigned (belonging to Planctomycetes anammox bacterium*) |
| G7  | <i>Denitratisoma</i>       | Nitrate denitrification and/or Aerobic chemoheterotrophy    |
| G8  | <i>Sideroxydans</i>        | Dark iron oxidation                                         |
| G9  | OLB12 (uncultured)         | Unassigned (belonging to Bacteroidetes bacterium*)          |
| G10 | <i>Bryobacter</i>          | Aerobic chemoheterotrophy                                   |

<sup>#</sup>The FAPROTAX database, which affiliates taxa with metabolic functions (particularly nitrogen and carbon cycling) based on the literature on cultured representatives.

\*According to the hierarchical taxonomic grouping.
